# Supplementary material
Source: PubMed Central journal article supplement (PMC2559950)
Supplement: NIHMS58725-supplement-Supp__File.pdf [file NIHMS58725-supplement-Supp__File.pdf]

---

**SUPPLEMENTARY MATERIAL.**

**Fission yeast SWI/SNF and RSC complexes show compositional and functional differences from budding yeast**

B.J. Monahan, J. Villén, S. Marguerat, J. Bähler, S.P. Gygi, and F. Winston.

---

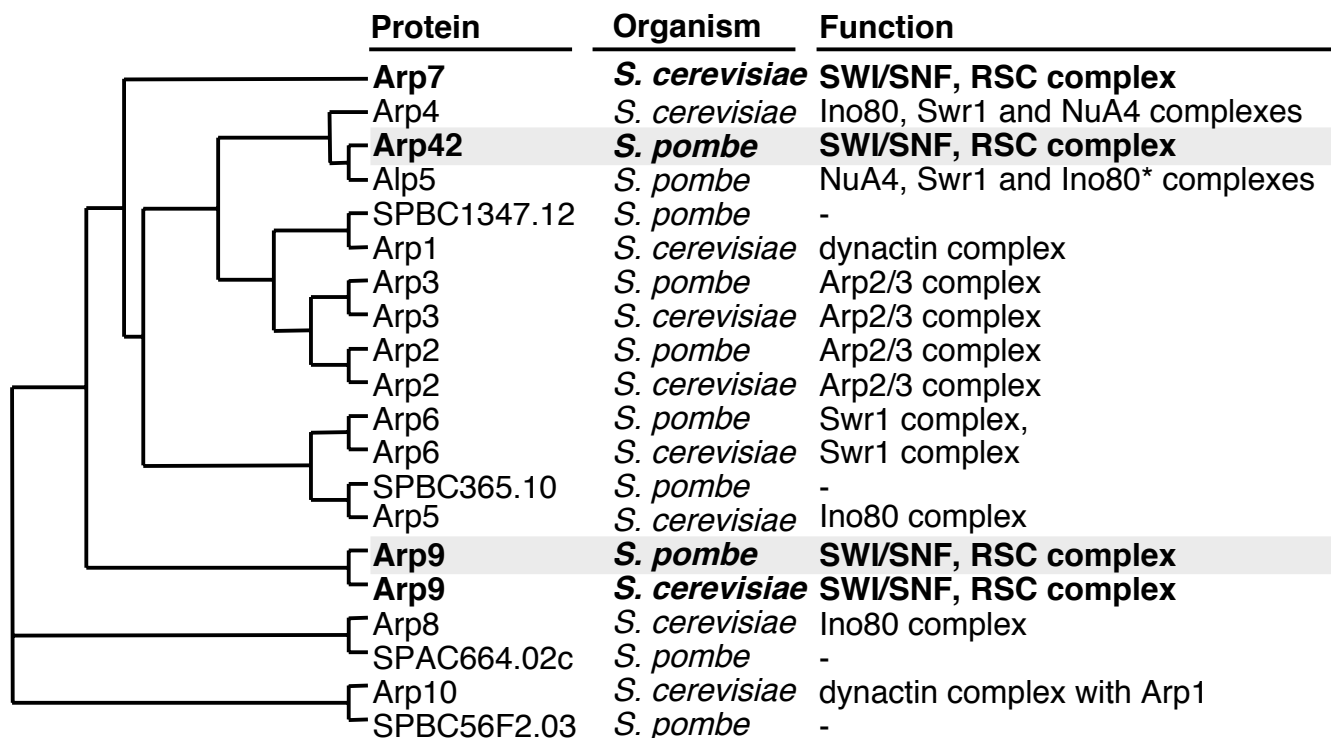

**Supplementary Figure 1. *S. pombe* actin related protein (ARP) family.** A dendrogram showing relatedness of the ten *S. pombe* and *S. cerevisiae* ARPs. *S. pombe* does not contain a gene encoding an Arp7 homolog but does contain two apparent Arp4 paralogs, named Alp5 and Arp42. ARPs present in SWI/SNF and RSC are highlighted in bold with the *S. pombe* complexes shaded in grey boxes. Putative function or association of each ARP is indicated where applicable. The tree was constructed by the neighbor-joining method with ClustalX<sup>4</sup>.

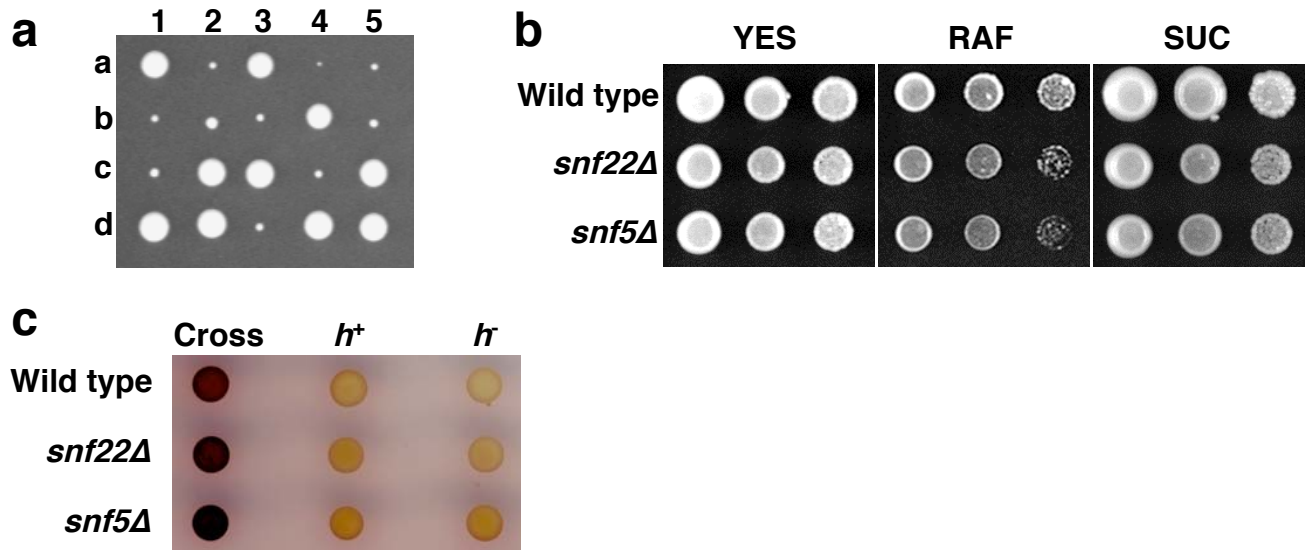

**Supplementary Figure 2. Deletion analysis of *S. pombe* SWI/SNF and RSC genes** (a) The *S. pombe rsc58Δ* mutant displays a severe growth phenotype. Shown are progeny after sporulation and tetrad dissection of a *rsc58*<sup>+</sup>/*rsc58Δ* diploid. The four progeny of each tetrad are labeled a-d. The small colonies are *rsc58Δ* and the large colonies are *rsc58*<sup>+</sup>. (b and c) *S. pombe* SWI/SNF mutants do not display phenotypes characteristic of *S. cerevisiae* SWI/SNF mutants. In contrast to phenotypes noted for *S. cerevisiae* SWI/SNF mutants *S. pombe snf22Δ* and *snf5Δ* mutants display wildtype growth on media containing sucrose or raffinose as the sole carbon source (b). (c) *S. pombe snf22Δ/snf22Δ* and *snf5Δ/snf5Δ* mutants display normal sporulation although a small proportion of asci have incorrect spore number (data not shown). Iodine staining of mating plates is shown. As a negative control, staining of the *h*<sup>+</sup> and *h*<sup>-</sup> parent strains is also shown.

| SYSTEMATIC | Protein       | Arp42:TAP |       | Arp9:TAP |       | no tag |    |
|------------|---------------|-----------|-------|----------|-------|--------|----|
|            |               | Exp 1     | Exp 2 | Exp 1    | Exp 2 |        |    |
| RSC        | SPAC1250.01   | Snf21     | 116   | 93       | 108   | 97     | 0  |
|            | SPBC4B4.03    | Rsc1      | 52    | 43       | 54    | 41     | 0  |
|            | SPBC1703.02   | Rsc9      | 55    | 49       | 46    | 44     | 0  |
|            | SPBC1734.15   | Rsc4      | 44    | 34       | 46    | 31     | 0  |
|            | SPCC16A11.14  | Sfh1      | 22    | 15       | 20    | 17     | 0  |
|            | SPAC1F3.07c   | Rsc58     | 22    | 21       | 19    | 21     | 0  |
|            | SPCC1281.05   | Rsc7      | 24    | 20       | 25    | 19     | 0  |
| Shared     | SPAC17G6.10   | Ssr1      | 45    | 37       | 49    | 35     | 0  |
|            | SPAC23H3.10   | Ssr2      | 37    | 35       | 36    | 31     | 0  |
|            | SPAC23G3.10c  | Ssr3      | 47    | 44       | 48    | 38     | 0  |
|            | SPBP23A10.05  | Ssr4      | 30    | 29       | 31    | 28     | 0  |
|            | SPAC1071.06   | Arp9      | 37    | 25       | 37    | 34     | 0  |
|            | SPAC23D3.09   | Arp42     | 31    | 30       | 33    | 30     | 0  |
| Swi/Snf    | SPCC1620.14c  | Snf22     | 54    | 41       | 39    | 41     | 0  |
|            | SPBC30B4.04c  | Sol1      | 28    | 27       | 24    | 28     | 0  |
|            | SPAC2F7.08c   | Snf5      | 22    | 16       | 20    | 18     | 0  |
|            | SPBC26H8.09c  | Snf59     | 29    | 29       | 22    | 25     | 0  |
|            | SPAC23G3.07c  | Snf30     | 9     | 8        | 6     | 7      | 0  |
|            | SPAC22H12.02  | Tfg3      | 1     | 2        | 0     | 2      | 0  |
| Ino80      | SPAC29B12.01  | Ino80     | 0     | 0        | 0     | 0      | 0  |
|            | SPBC365.10    | Arp5      | 0     | 0        | 0     | 0      | 0  |
|            | SPAC664.02C   | Arp8      | 0     | 0        | 0     | 0      | 0  |
|            | SPBC28F2.11   | (Nhp10)   | 0     | 0        | 0     | 0      | 0  |
| Swr1       | SPAPB8E5.09   | Rvp1      | 1     | 0        | 0     | 0      | 1  |
|            | SPBC83.08     | Rvp2      | 0     | 0        | 1     | 0      | 0  |
|            | SPBP23A10.08* | Alp5      | 0     | 0        | 0     | 0      | 0  |
|            | SPBC32H8.12c* | actin     | 19    | 9        | 21    | 10     | 11 |
|            | SPAC11E3.01c  | Swr1      | 0     | 0        | 0     | 0      | 0  |
|            | SPCC550.12    | Arp6      | 0     | 0        | 0     | 0      | 0  |
|            | SPBP35G2.13C  | Swc2      | 0     | 0        | 0     | 0      | 0  |
|            | SPAC9G1.13C*  | Swc4      | 0     | 0        | 0     | 0      | 0  |
|            | SPCC576.13    | Swc5      | 0     | 0        | 0     | 0      | 0  |
|            | SPAC17G8.07*  | (Yaf9)    | 0     | 0        | 0     | 0      | 0  |
| NuA4       | SPBC29A3.05   | (Vps71)   | 0     | 0        | 0     | 0      | 0  |
|            | SPAC637.12C   | Mst1      | 0     | 0        | 0     | 0      | 0  |
|            | SPCC1795.08C  | (Eaf1)    | 0     | 0        | 0     | 0      | 0  |
|            | SPAC23H4.12   | Alp13     | 0     | 0        | 0     | 0      | 0  |
|            | SPAC6F6.09    | (Eaf6)    | 0     | 0        | 0     | 0      | 0  |
|            | SPBC16A3.19   | Eaf7      | 0     | 0        | 0     | 0      | 0  |
|            | SPCC830.05C   | Epl1      | 0     | 0        | 0     | 0      | 0  |
|            | SPBC1709.11C  | Png2      | 0     | 0        | 0     | 0      | 0  |
|            | SPBP16F5.03C  | Tra1      | 0     | 0        | 0     | 0      | 0  |

**Supplementary Figure 3. The *S. pombe* actin related proteins Arp42 and Arp9 are specific to the SWI/SNF and RSC chromatin remodeling complexes.** Mass-spectrometry analysis of duplicate Arp42-TAP and Arp9-TAP purifications are shown. The number of unique peptides identified in the mass-spectra for the respective protein for each purification is shown. To illustrate specificity of Arp42 and Arp9, various proteins predicted to be members of the *S. pombe* chromatin remodeling or modifying complexes known to contain ARPs, namely NuA4, Swr1 and Ino80, are shown. The name of the respective complex is indicated on the left. Asterisks represent proteins that are also putative components of the NuA4 complex.

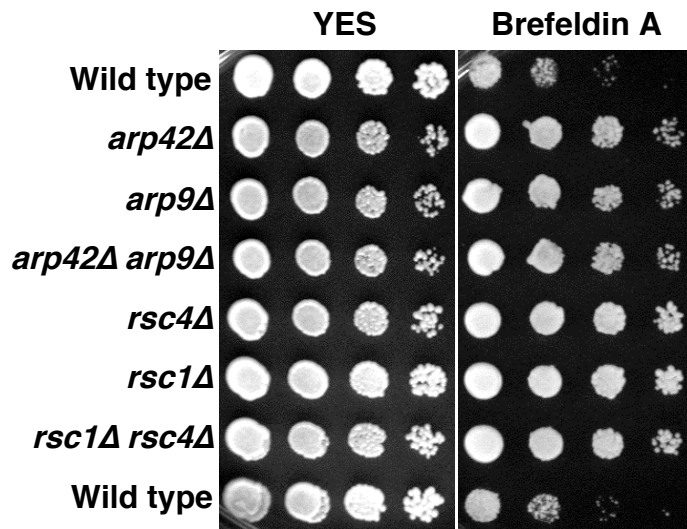

**Supplementary Figure 4. *S. pombe* RSC mutants show brefeldin A resistance.** Wild type (FWP52), *arp42Δ* (FWP239), *arp9Δ* (FWP240), *arp42Δ arp9Δ* (FWP249), *rsc1Δ* (FWP234), *rsc4Δ* (FWP242), and *rsc1Δ rsc4Δ* (FWP250) strains were grown in liquid YES medium to stationary phase, subjected to 10-fold serial dilutions, and spotted onto solid YES medium containing 10  $\mu\text{g ml}^{-1}$  brefeldin A.

**Supplementary Table 1. Summary of BLASTP analysis of the *S. pombe* protein set searching for RSC (a) and SWI/SNF (b).**

(a)

| <i>S. cerevisiae</i> RSC complex |            |           | <i>S. pombe</i> BLASTP top hit(s) <sup>1</sup> |                     |             |               |
|----------------------------------|------------|-----------|------------------------------------------------|---------------------|-------------|---------------|
| protein                          | systematic | size (aa) | protein                                        | systematic          | size (aa)   | e-value       |
| Sth1                             | YIL126W    | 1359      | <b>Snf21</b>                                   | <b>SPAC1250.01</b>  | <b>1199</b> | <b>7E-262</b> |
|                                  |            |           | Snf22                                          | SPCC1620.14c        | 1680        | 3E-253        |
| Rsc1                             | YGR056W    | 928       | <b>Rsc1</b>                                    | <b>SPBC4B4.03</b>   | <b>803</b>  | <b>1E-56</b>  |
| Rsc2                             | YLR357W    | 889       | <b>Rsc1</b>                                    | <b>SPBC4B4.03</b>   | <b>803</b>  | <b>1E-58</b>  |
| Rsc3                             | YDR303C    | 885       |                                                | SPAPB1A11.04c       | 697         | 2E-06         |
| Rsc30                            | YHR056C    | 832       | Moc3                                           | SPAC821.07c         | 497         | 2E-05         |
| Rsc4                             | YKR008W    | 625       | <b>Rsc4</b>                                    | <b>SPBC1734.15</b>  | <b>542</b>  | <b>3E-17</b>  |
| Rsc9                             | YML127W    | 581       | <b>Rsc9</b>                                    | <b>SPBC1703.02</b>  | <b>780</b>  | <b>1E-23</b>  |
| Rsc8                             | YFR037C    | 557       | <b>Ssr2</b>                                    | <b>SPAC23H3.10</b>  | <b>503</b>  | <b>4E-73</b>  |
|                                  |            |           | <b>Ssr1</b>                                    | <b>SPAC17G6.10</b>  | <b>527</b>  | <b>5E-64</b>  |
| Rsc58                            | YLR033W    | 502       |                                                | SPBC215.07c         | 568         | 6E-02         |
| Rsc6                             | YCR052W    | 483       | <b>Ssr3</b>                                    | <b>SPAC23G3.10c</b> | <b>425</b>  | <b>5E-15</b>  |
| Arp7                             | YPR034W    | 477       | <b>Arp42</b>                                   | <b>SPAC23D3.09</b>  | <b>430</b>  | <b>4E-27</b>  |
| Arp9                             | YMR033W    | 467       | <b>Arp9</b>                                    | <b>SPAC1071.06</b>  | <b>523</b>  | <b>3E-21</b>  |
| Rsc7                             | YMR091C    | 435       | <b>Rsc7</b>                                    | <b>SPCC1281.05</b>  | <b>390</b>  | <b>2E-46</b>  |
| Sfh1                             | YLR321C    | 426       | <b>Sfh1</b>                                    | <b>SPCC16A11.14</b> | <b>418</b>  | <b>1E-33</b>  |
| Rtt102                           | YGR275W    | 186       | Swr1                                           | SPAC2H10.03c        | 1288        | 7E-02         |
| Ldb7                             | YBL006C    | 145       |                                                | No hits, E < 0.01   |             |               |
| Htl1                             | YCR020W-B  | 78        | Mde1                                           | SPBC31F10.08        | 209         | 3E-02         |

(b)

| <i>S. cerevisiae</i> SWI/SNF complex |            |           | <i>S. pombe</i> BLASTP top hit(s) <sup>1</sup> |                     |             |               |
|--------------------------------------|------------|-----------|------------------------------------------------|---------------------|-------------|---------------|
| protein                              | systematic | size (aa) | protein                                        | systematic          | size (aa)   | e-value       |
| Snf2                                 | YOR290C    | 1703      | <b>Snf22</b>                                   | <b>SPCC1620.14c</b> | <b>1680</b> | <b>6E-279</b> |
|                                      |            |           | Snf21                                          | SPAC1250.01         | 1199        | 2E-231        |
| Swi1                                 | YPL016W    | 1314      | <b>Sol1</b>                                    | <b>SPBC30B4.04c</b> | <b>865</b>  | <b>7E-24</b>  |
| Snf5                                 | YBR289W    | 905       | <b>Snf5</b>                                    | <b>SPAC2F7.08c</b>  | <b>632</b>  | <b>8E-45</b>  |
| Swi3                                 | YJL176C    | 825       | <b>Ssr2</b>                                    | <b>SPAC23H3.10</b>  | <b>503</b>  | <b>9E-60</b>  |
|                                      |            |           | <b>Ssr1</b>                                    | <b>SPAC17G6.10</b>  | <b>527</b>  | <b>3E-51</b>  |
| Swp82                                | YFL049W    | 623       | Rsc7                                           | SPCC1281.05         | 390         | 1E-11         |
| Snf12                                | YNR023W    | 566       | <b>Ssr3</b>                                    | <b>SPAC23G3.10c</b> | <b>425</b>  | <b>1E-22</b>  |
| Arp7                                 | YPR034W    | 477       | <b>Arp42</b>                                   | <b>SPAC23D3.09</b>  | <b>430</b>  | <b>4E-27</b>  |
| Arp9                                 | YMR033W    | 467       | <b>Arp9</b>                                    | <b>SPAC1071.06</b>  | <b>523</b>  | <b>3E-21</b>  |
| Snf6                                 | YHL025W    | 332       |                                                | No hits E < 0.01    |             |               |
| Taf14                                | YPL129W    | 244       | <b>Tfg3</b>                                    | <b>SPAC22H12.02</b> | <b>241</b>  | <b>3E-48</b>  |
| Rtt102                               | YGR275W    | 186       | Swr1                                           | SPAC2H10.03c        | 1288        | 7E-02         |
| Snf11                                | YDR073W    | 169       | -                                              | SPBC660.06          | 273         | 1E-03         |

<sup>1</sup> Bold indicates that the protein was subsequently identified as a component of the respective complex.

**Supplementary Table 2. Deletion analysis of *S. pombe* SWI/SNF and RSC genes and comparison to *S. cerevisiae***

| <i>S. pombe</i>            |                           | <i>S. cerevisiae</i>                   |                                             |
|----------------------------|---------------------------|----------------------------------------|---------------------------------------------|
| <u>subunit<sup>a</sup></u> | <u>deletion phenotype</u> | <u>ortholog</u>                        | <u>deletion phenotype</u>                   |
| Snf22                      | viable                    | Snf2                                   | viable                                      |
| Snf5                       | viable                    | Snf5                                   | viable                                      |
| Sol1                       | viable                    | Swi1                                   | viable                                      |
| Tfg3                       | viable                    | Taf14                                  | viable                                      |
| Snf59                      | viable                    | Swp82                                  | viable                                      |
| Snf30                      | viable                    |                                        |                                             |
| Ssr1                       | inviable                  | Swi3 <sup>b</sup> , Rsc8 <sup>c</sup>  | <i>swi3Δ</i> viable, <i>rsc8Δ</i> inviable  |
| Ssr2                       | inviable                  | Swi3 <sup>b</sup> , Rsc8 <sup>c</sup>  | <i>swi3Δ</i> viable, <i>rsc8Δ</i> inviable  |
| Ssr3                       | inviable                  | Snf12 <sup>b</sup> , Rsc6 <sup>c</sup> | <i>snf12Δ</i> viable, <i>rsc6Δ</i> inviable |
| Ssr4                       | inviable                  |                                        |                                             |
| Arp42                      | viable                    |                                        |                                             |
| Arp9                       | viable                    | Arp9                                   | inviable or sick <sup>d</sup>               |
| Snf21                      | inviable                  | Sth1                                   | inviable                                    |
| Sfh1                       | inviable                  | Sfh1                                   | inviable                                    |
| Rsc9                       | inviable                  | Rsc9                                   | inviable                                    |
| Rsc7                       | inviable                  | Rsc7                                   | viable                                      |
| Rsc1                       | viable                    | Rsc1, Rsc2                             | double mutant inviable                      |
| Rsc4                       | viable                    | Rsc4                                   | inviable                                    |
| Rsc58                      | viable                    | Rsc58                                  | inviable                                    |

<sup>a</sup>The top group of subunits in the unshaded boxes is in *S. pombe* SWI/SNF, the middle shaded group is shared between SWI/SNF and RSC, and the bottom unshaded group is in *S. pombe* RSC.

<sup>b</sup>Part of *S. cerevisiae* SWI/SNF.

<sup>c</sup>Part of *S. cerevisiae* RSC.

<sup>d</sup>The null phenotype depends upon the genetic background<sup>1</sup>.

**Supplementary Table 3. Mass-spectrometry analysis of RSC and SWI/SNF purifications in the presence or absence of Arp42 and Arp9.** Shared components are within grey box with RSC-specific subunits above and SWI/SNF-specific subunits below. This analysis also indicated that no other *S. pombe* ARP or actin substitute for either *arp42Δ* or *arp9Δ*. The 10 *S. pombe* ARPs and actin(Act1) are shown in red.

| protein      | RSC (Snf21-TAP)  |             |             |             | SWI/SNF (Snf21-TAP) |             |             |             | controls |          |
|--------------|------------------|-------------|-------------|-------------|---------------------|-------------|-------------|-------------|----------|----------|
|              | 350 mM NaCl      |             | 150 mM NaCl |             | 350 mM NaCl         |             | 150 mM NaCl |             | 350      | 150      |
|              | <i>arp+</i>      | <i>arpΔ</i> | <i>arp+</i> | <i>arpΔ</i> | <i>arp+</i>         | <i>arpΔ</i> | <i>arp+</i> | <i>arpΔ</i> |          |          |
| Snf21        | 103 <sup>a</sup> | 123         | 130         | 109         | 10                  | 7           | 9           | 9           | 2        | 1        |
| Rsc1         | 44               | 45          | 53          | 47          | 0                   | 0           | 0           | 1           | 0        | 0        |
| Rsc9         | 50               | 47          | 60          | 45          | 2                   | 3           | 0           | 1           | 0        | 0        |
| Rsc4         | 35               | 36          | 46          | 36          | 0                   | 0           | 0           | 0           | 0        | 0        |
| Sfh1         | 16               | 15          | 20          | 20          | 1                   | 0           | 0           | 0           | 1        | 0        |
| Rsc58        | 17               | 18          | 23          | 22          | 1                   | 0           | 0           | 0           | 0        | 1        |
| Rsc7         | 21               | 24          | 27          | 21          | 0                   | 0           | 0           | 0           | 1        | 1        |
| Ssr1         | 39               | 46          | 44          | 38          | 42                  | 44          | 38          | 40          | 1        | 0        |
| Ssr2         | 37               | 38          | 39          | 31          | 32                  | 33          | 29          | 38          | 0        | 2        |
| Ssr3         | 50               | 50          | 52          | 46          | 40                  | 40          | 40          | 41          | 0        | 0        |
| Ssr4         | 27               | 27          | 32          | 26          | 20                  | 20          | 24          | 26          | 0        | 1        |
| <b>Arp9</b>  | <b>24</b>        | <b>0</b>    | <b>31</b>   | <b>0</b>    | <b>25</b>           | <b>1</b>    | <b>23</b>   | <b>3</b>    | <b>2</b> | <b>1</b> |
| <b>Arp42</b> | <b>29</b>        | <b>0</b>    | <b>30</b>   | <b>0</b>    | <b>30</b>           | <b>0</b>    | <b>23</b>   | <b>0</b>    | <b>0</b> | <b>1</b> |
| Snf22        | 0                | 1           | 0           | 0           | 96                  | 90          | 99          | 97          | 0        | 0        |
| Sol1         | 0                | 0           | 0           | 0           | 38                  | 40          | 40          | 50          | 0        | 0        |
| Snf5         | 0                | 0           | 0           | 0           | 47                  | 35          | 39          | 33          | 0        | 0        |
| Snf59        | 0                | 0           | 0           | 0           | 62                  | 60          | 52          | 54          | 0        | 0        |
| Snf30        | 0                | 0           | 0           | 0           | 20                  | 18          | 17          | 12          | 0        | 0        |
| Tfg3         | 0                | 0           | 0           | 0           | 9                   | 9           | 5           | 11          | 0        | 0        |
| <i>Alp5</i>  | 0                | 0           | 0           | 0           | 0                   | 0           | 0           | 0           | 0        | 0        |
| <i>Arp1</i>  | 0                | 0           | 0           | 0           | 0                   | 0           | 0           | 0           | 0        | 0        |
| <i>Arp2</i>  | 0                | 0           | 0           | 0           | 0                   | 0           | 0           | 0           | 0        | 0        |
| <i>Arp3</i>  | 0                | 0           | 0           | 0           | 0                   | 0           | 0           | 0           | 0        | 0        |
| <i>Arp5</i>  | 0                | 0           | 0           | 0           | 0                   | 0           | 0           | 0           | 0        | 0        |
| <i>Arp6</i>  | 0                | 0           | 0           | 0           | 0                   | 0           | 0           | 0           | 0        | 0        |
| <i>Arp8</i>  | 0                | 0           | 0           | 0           | 0                   | 0           | 0           | 0           | 0        | 0        |
| <i>Arp10</i> | 0                | 0           | 0           | 0           | 0                   | 0           | 0           | 0           | 0        | 0        |
| <i>Act1</i>  | 25               | 19          | 21          | 22          | 28                  | 25          | 34          | 23          | 25       | 9        |

<sup>a</sup>Number of unique peptides for the respective protein.



**Supplementary Table 4.** Microarray data of SWI/SNF mutants showing the fold-change in mRNA levels for the hexose and iron transporter genes and their known repressors (in blue).

| <b>gene</b>               | <b><i>snf22</i>Δ</b> | <b><i>snf5</i>Δ</b> | <b>Description</b>                         |
|---------------------------|----------------------|---------------------|--------------------------------------------|
| <i>fip1</i> <sup>+</sup>  | 4.3                  | 3.2                 | Iron permease FTR1 family                  |
| <i>frp1</i> <sup>+</sup>  | 15.0                 | 10.4                | Ferric reductase transmembrane component   |
| <i>fio1</i> <sup>+</sup>  | 2.5                  | 2.2                 | iron transport multicopper oxidase         |
| <i>str1</i> <sup>+</sup>  | 2.2                  | 2.1                 | Siderophore iron transporter               |
| <i>str2</i> <sup>+</sup>  | 1.7                  | 1.5                 | Siderophore iron transporter               |
| <i>str3</i> <sup>+</sup>  | 8.1                  | 14.1                | Siderophore iron transporter               |
| <i>ght1</i> <sup>+</sup>  | 2.5                  | 2.9                 | hexose transporter                         |
| <i>ght2</i> <sup>+</sup>  | 2.0                  | 1.6                 | hexose transporter                         |
| <i>ght3</i> <sup>+</sup>  | 5.3                  | 4.4                 | hexose transporter                         |
| <i>ght4</i> <sup>+</sup>  | 11.4                 | 10.3                | hexose transporter                         |
| <i>ght5</i> <sup>+</sup>  | 3.6                  | 3.7                 | hexose transporter                         |
| <i>ght6</i> <sup>+</sup>  | 4.3                  | 3.0                 | hexose transporter                         |
| <i>ght7</i> <sup>+</sup>  | 0.9                  | 1.3                 | hexose transporter                         |
| <i>ght8</i> <sup>+</sup>  | 3.4                  | 2.5                 | hexose transporter                         |
| <i>fep1</i> <sup>+</sup>  | 0.9                  | 1.0                 | GATA transcription factor iron repressor   |
| <i>scr1</i> <sup>+</sup>  | 1.4                  | 1.3                 | Mig1/CreA-like carbon catabolite repressor |
| <i>tup11</i> <sup>+</sup> | 1.1                  | 1.1                 | transcriptional corepressor                |
| <i>tup12</i> <sup>+</sup> | 1.2                  | 1.2                 | transcriptional corepressor                |

**Supplementary Table 5. *S. pombe* strains used in this study**

| <b>Strain</b> | <b>Genotype</b>                                                                                                              | <b>Source</b>                       |
|---------------|------------------------------------------------------------------------------------------------------------------------------|-------------------------------------|
| FWP52         | <i>h<sup>+</sup> leu1-32 ade6-m216</i>                                                                                       | Lab stock                           |
| FWP165        | <i>h<sup>+</sup> ura4-D18 leu1-32 ade6-m216</i>                                                                              | Lab stock                           |
| FWP172        | <i>h<sup>-</sup> ura4-D18 leu1-32 ade6-m210</i>                                                                              | Lab stock                           |
| FWP253        | <i>h<sup>+</sup> fep1::ura4<sup>+</sup> ura4-D18 leu1-32 ade6-M210 his7-366</i>                                              | Pelletier <i>et al</i> <sup>2</sup> |
| FWP197        | <i>h<sup>-</sup> tup11::ura4<sup>+</sup> tup12::ura4<sup>+</sup> ura4-D18 leu1-32</i>                                        | Janoo <i>et al</i> <sup>3</sup>     |
| FWP218        | <i>h<sup>+</sup> snf21<sup>+</sup>-TAP::KANMX6 ura4-D18 leu1-32 ade6-m216</i>                                                | This study                          |
| FWP219        | <i>h<sup>+</sup> snf22<sup>+</sup>-TAP::KANMX6 ura4-D18 leu1-32 ade6-m216</i>                                                | This study                          |
| FWP220        | <i>h<sup>+</sup> snf5<sup>+</sup>-TAP::KANMX6 ura4-D18 leu1-32 ade6-m216</i>                                                 | This study                          |
| FWP221        | <i>h<sup>+</sup> sfh1<sup>+</sup>-TAP::KANMX6 ura4-D18 leu1-32 ade6-m216</i>                                                 | This study                          |
| FWP222        | <i>h<sup>+</sup> snf59<sup>+</sup>-TAP::KANMX6 ura4-D18 leu1-32 ade6-m216</i>                                                | This study                          |
| FWP223        | <i>h<sup>+</sup> snf30<sup>+</sup>-TAP::KANMX6 ura4-D18 leu1-32 ade6-m216</i>                                                | This study                          |
| FWP224        | <i>h<sup>+</sup> rsc7<sup>+</sup>-TAP::KANMX6 ura4-D18 leu1-32 ade6-m216</i>                                                 | This study                          |
| FWP225        | <i>h<sup>+</sup> rsc1<sup>+</sup>-TAP::KANMX6 ura4-D18 leu1-32 ade6-m216</i>                                                 | This study                          |
| FWP226        | <i>h<sup>+</sup> arp42<sup>+</sup>-TAP::KANMX6 ura4-D18 leu1-32 ade6-m216</i>                                                | This study                          |
| FWP227        | <i>h<sup>+</sup> arp9<sup>+</sup>-TAP::KANMX6 ura4-D18 leu1-32 ade6-m216</i>                                                 | This study                          |
| FWP287        | <i>h<sup>+</sup></i>                                                                                                         | This study                          |
| FWP289        | <i>h<sup>+</sup> snf22<sup>+</sup>-TAP::KANMX6</i>                                                                           | This study                          |
| FWP228        | <i>h<sup>+</sup>/h<sup>-</sup> snf21::ura4<sup>+</sup> ura4-D18 /ura4-D18 leu1-32/leu1-32 ade6m216/ade6-m210</i>             | This study                          |
| FWP229        | <i>h<sup>+</sup> snf22::ura4<sup>+</sup> ura4-D18 leu1-32 ade6-m216</i>                                                      | This study                          |
| FWP230        | <i>h<sup>-</sup> snf22::ura4<sup>+</sup> ura4-D18 leu1-32 ade6-m210</i>                                                      | This study                          |
| FWP231        | <i>h<sup>+</sup> snf5::ura4<sup>+</sup> ura4-D18 leu1-32 ade6-m216</i>                                                       | This study                          |
| FWP232        | <i>h<sup>-</sup> snf5::ura4<sup>+</sup> ura4-D18 leu1-32 ade6-m210</i>                                                       | This study                          |
| FWP233        | <i>h<sup>+</sup>/h<sup>-</sup> sfh1::ura4<sup>+</sup> ura4-D18 /ura4-D18 leu1-32/leu1-32 ade6-m216/ade6-m210</i>             | This study                          |
| FWP234        | <i>h<sup>+</sup> rsc1::ura4<sup>+</sup> ura4-D18 leu1-32 ade6-m216</i>                                                       | This study                          |
| FWP235        | <i>h<sup>+</sup>/h<sup>-</sup> rsc7::ura4<sup>+</sup> ura4-D18 /ura4-D18 leu1-32/leu1-32 ade6-m216/ade6-m210</i>             | This study                          |
| FWP236        | <i>h<sup>+</sup>/h<sup>-</sup> ssr1::ura4<sup>+</sup> ura4-D18 /ura4-D18 leu1-32/leu1-32 ade6-m216/ade6-m210</i>             | This study                          |
| FWP237        | <i>h<sup>+</sup>/h<sup>-</sup> ssr2::ura4<sup>+</sup> ura4-D18 /ura4-D18 leu1-32/leu1-32 ade6-m216/ade6-m210</i>             | This study                          |
| FWP238        | <i>h<sup>+</sup>/h<sup>-</sup> ssr3::ura4<sup>+</sup> ura4-D18 /ura4-D18 leu1-32/leu1-32 ade6-m216/ade6-m210</i>             | This study                          |
| FWP239        | <i>h<sup>+</sup> arp42::ura4<sup>+</sup> ura4-D18 leu1-32 ade6-m210</i>                                                      | This study                          |
| FWP240        | <i>h<sup>+</sup> arp9::ura4<sup>+</sup> ura4-D18 leu1-32 ade6-m210</i>                                                       | This study                          |
| FWP241        | <i>h<sup>+</sup>/h<sup>-</sup> ssr4::ura4<sup>+</sup> ura4-D18 /ura4-D18 leu1-32/leu1-32 ade6-m216/ade6-m210</i>             | This study                          |
| FWP242        | <i>h<sup>+</sup> rsc4::ura4<sup>+</sup> ura4-D18 leu1-32 ade6-m216</i>                                                       | This study                          |
| FWP243        | <i>h<sup>+</sup>/h<sup>-</sup> rsc9::ura4<sup>+</sup> ura4-D18 /ura4-D18 leu1-32/leu1-32 ade6-m216/ade6-m210</i>             | This study                          |
| FWP244        | <i>h<sup>+</sup> rsc58::ura4<sup>+</sup> ura4-D18 leu1-32 ade6-m216</i>                                                      | This study                          |
| FWP245        | <i>h<sup>+</sup> sol1::ura4<sup>+</sup> ura4-D18 leu1-32 ade6-m216</i>                                                       | This study                          |
| FWP246        | <i>h<sup>+</sup> tfg3::ura4<sup>+</sup> ura4-D18 leu1-32 ade6-m216</i>                                                       | This study                          |
| FWP247        | <i>h<sup>+</sup> snf59::ura4<sup>+</sup> ura4-D18 leu1-32 ade6-m216</i>                                                      | This study                          |
| FWP248        | <i>h<sup>+</sup> snf30::ura4<sup>+</sup> ura4-D18 leu1-32 ade6-m216</i>                                                      | This study                          |
| FWP249        | <i>h<sup>+</sup> arp42::ura4<sup>+</sup> arp9::ura4<sup>+</sup> ura4-D18 leu1-32 ade6-m210</i>                               | This study                          |
| FWP250        | <i>h<sup>+</sup> rsc1::ura4<sup>+</sup> rsc4::ura4<sup>+</sup> ura4-D18 leu1-32 ade6-m216</i>                                | This study                          |
| FWP251        | <i>h<sup>+</sup> snf21<sup>+</sup>-TAP::KANMX6 arp42::ura4<sup>+</sup> arp9::ura4<sup>+</sup> ura4-D18 leu1-32 ade6-m210</i> | This study                          |
| FWP252        | <i>h<sup>+</sup> snf22<sup>+</sup>-TAP::KANMX6 arp42::ura4<sup>+</sup> arp9::ura4<sup>+</sup> ura4-D18 leu1-32 ade6-m216</i> | This study                          |

**Supplementary Table 6. Oligonucleotide primers used in this study.**

| Gene                     | Name   | Sequence                                                                                                      | Description  |
|--------------------------|--------|---------------------------------------------------------------------------------------------------------------|--------------|
| <i>snf21<sup>+</sup></i> | FO3577 | TGTTTGTTTTTATTTCAATAATAACGACCTGGAAATCGTCTA<br>TTTATGTGGTAATTTGGATTTTTGATCACAAATCGCCAGGGT<br>TTTCCCAGTCACGAC   | Deletion-For |
|                          | FO3578 | AACAAAAAAAAAGACAATCTGTGTTTTTATGAGACTTCAGCAC<br>TTGCATCTATAGTAGTTCAAAAAAGCAATTAATAGCGGATA<br>ACAATTTACACAGGA   | Deletion-Rev |
|                          | FO3569 | AGGATGGCACATTAGCAACGCTTCGCGGAATGGAGGCGGA<br>GGCTACATCGCAATTGGAAGACAGAATTGAAAATGAGGCTC<br>GGATCCCCGGGTAAATTA   | TAP-For      |
|                          | FO3570 | AAAAACAAAAAAAAAGACAATCTGTGTTTTTATGAGACTTCA<br>GCACTTGCATCTATAGTAGTTCAAAAAAGCAATTAATGAAT<br>TCGAGCTCGTTAAAC    | TAP-Rev      |
| <i>snf22<sup>+</sup></i> | FO3579 | TCCATTTGTACGTTGAGGGTTTTTCGGTCATTGTTGTTGTAAT<br>ATTGATTTGCGATTTACTAAAACACATTTCTCCGCGCCAGGG<br>TTTTCCCAGTCACGAC | Deletion-For |
|                          | FO3580 | CCTCACCTAACAAAATGTACCAAAATATTATAAACAAGGCAT<br>TAAATAAAACGACAAAAGGTAAAACGTTAGTCCAGCGGATA<br>ACAATTTACACAGGA    | Deletion-Rev |
|                          | FO3571 | TACCGTTGGATTCTGGTATAGTAAGCGCCGAAGATGACAAA<br>GTTATTACTTATGAAGATTCTTCTTCTTATTTCGGAGCGG<br>ATCCCCGGGTAAATTA     | TAP-For      |
|                          | FO3572 | TAGTCCTCACCTAACAAAATGTACCAAAATATTATAAACAAG<br>GCATTAAAATAAAACGACAAAAGGTAAAACGTTAGTCCGAAT<br>TCGAGCTCGTTAAAC   | TAP-Rev      |
| <i>snf5<sup>+</sup></i>  | FO3581 | AAGAATGACACCGATATATGATATTCTTTCTAATAACATTTGC<br>ACTTAAACGAATCTTTACTTTTTTTTTAAATCTCGCCAGGGTT<br>TTCCCAGTCACGAC  | Deletion-For |
|                          | FO3582 | CTGGTCCGTCGAGCTATCCATAACGTGAGTCAAATCTTGATT<br>ATGGTCTTTGATAAAGATTCTTCCAAAATTGTATAGCGGATA<br>ACAATTTACACAGGA   | Deletion-Rev |
|                          | FO3573 | ATTTCCATATCCACTTGTTGTCAAGCTCGCATCAACAAAAA<br>AGGAGGTGAGAATGAATACGGTTTTGGATAGAAATACTCGG<br>ATCCCCGGGTAAATTA    | TAP-For      |
|                          | FO3574 | GAAACTGGTCCGTCGAGCTATCCATAACGTGAGTCAAATCT<br>TGATTATGGTCTTTGATAAAGATTCTTCCAAAATTGTATGAAT<br>TCGAGCTCGTTAAAC   | TAP-Rev      |
| <i>sfh1<sup>+</sup></i>  | FO3583 | CCAAGTAAATTGACTTGCGGCTTACATAGTTTTTTTGGC<br>ATACTTGTGCAAACACGACTTACAAATTTACACGCCAGG<br>GTTTTCCCAGTCACGAC       | Deletion-For |
|                          | FO3584 | TTCTCATTAAATTCGTCTCCTTAAAACACGACTAATGAACAT<br>CAAATACATCAGTCCATTAGAGTAAAACATCTTAGCGGATAA<br>CAATTTACACAGGA    | Deletion-Rev |
|                          | FO3575 | ACAAATCATTGTGCAATGCTTGTGGTGTTCATATGCTAAAA<br>CAGGACAATTGCCATATTGGAGAAAATCTCTATACACTCGGA<br>TCCCCGGGTAAATTA    | TAP-For      |
|                          | FO3576 | GACCTTCTCCATTAAATTCGTCTCCTTAAAACACGACTAATG<br>AACATCAAATACATCAGTCCATTAGAGTAAAACATCTTGAAT<br>TCGAGCTCGTTAAAC   | TAP-Rev      |
| <i>rsc1<sup>+</sup></i>  | FO4016 | TGATATACCCGTTAAAAATCTTACGAACAAGGTACGGGTAC<br>GTCTTCCACGAAAACACCAAGAAAATCCATCAGTGAGACGC<br>CAGGGTTTTCCCAGTCA   | Deletion-For |

|                          |        |                                                                                                                |              |
|--------------------------|--------|----------------------------------------------------------------------------------------------------------------|--------------|
|                          | FO4017 | ATATACATTATTAGGTTCTAAAAATCTTCAAATCTATCACAAT<br>ATTTGTTTTCTAAAAATCACAGTGAGTAATTTTCACTAGCGG<br>ATAACAATTTTCACAC  | Deletion-Rev |
|                          | FO3575 | ACAAATCATTGTGCAATGCTTGTGGTGTTCATATGCTAAAA<br>CAGGACAATTGCCATATTGGAGAAAATCTCTATACACTCGGA<br>TCCCCGGGTTAATTAA    | TAP-For      |
|                          | FO3576 | GACCTTCTCCATTAATTCGTCTCCTTAAAACACGACTAATG<br>AACATCAAATACATCAGTCCATTAGAGTAAAACATCTTGAAT<br>TCGAGCTCGTTTAAAC    | TAP-Rev      |
| <i>rsc7<sup>+</sup></i>  | FO4018 | AAAAAGCAATTTTTAACACAGTGCTATTCAGTACGATAAGAT<br>TGAAGTGTATGGAATAAACACCTTGCAATTAAGTACGCC<br>AGGGTTTTCCCAGTCA      | Deletion-For |
|                          | FO4019 | TGATAAATGACTGTATACAATCTGAAAATTAATATTATAAAAC<br>ATCCAAAACAAAATAGGATTAAGAAAACGAGCACTAGCG<br>GATAACAATTTTCACAC    | Deletion-Rev |
|                          | FO3575 | ACAAATCATTGTGCAATGCTTGTGGTGTTCATATGCTAAAA<br>CAGGACAATTGCCATATTGGAGAAAATCTCTATACACTCGGA<br>TCCCCGGGTTAATTAA    | TAP-For      |
|                          | FO3576 | GACCTTCTCCATTAATTCGTCTCCTTAAAACACGACTAATG<br>AACATCAAATACATCAGTCCATTAGAGTAAAACATCTTGAAT<br>TCGAGCTCGTTTAAAC    | TAP-Rev      |
| <i>ssr1<sup>+</sup></i>  | FO4020 | TGCATTTTATTGACGTGAAGCTTTTAAAGCCCTTGGCGTTGA<br>GGATTTTGAAATATTATACTAGACTCTAACACCACAACGCC<br>AGGGTTTTCCCAGTCA    | Deletion-For |
|                          | FO4021 | ATTAAGATAAGATAAAAAAAAAAATTCATTTAAATAAAAGCCTA<br>ATAAATTTTTATCCGATAAGCATATTAGTTGAGATTAAGCGG<br>ATAACAATTTTCACAC | Deletion-Rev |
| <i>ssr2<sup>+</sup></i>  | FO4022 | TTACAACTTAAAAACAACCTAATTTTGTGGGTATTACATTTTT<br>TTCGTGAGTGGACTATTCAAAAATCAGACCTTCACGACGCC<br>AGGGTTTTCCCAGTCA   | Deletion-For |
|                          | FO4023 | TACATATATATATGTCTATAAAAAGTAGATAGCCAAAAGAACT<br>TCATGCAGAATACAAATTTGAATTTGGTGAACCTAACAGCGG<br>ATAACAATTTTCACAC  | Deletion-Rev |
| <i>ssr3<sup>+</sup></i>  | FO4024 | ACGTCCACCAATATCGAAGATTATTGATCGGTTCCGGATTGC<br>CGCATATTTGAGAGGAGCTTGAATAAGGACAGCTTATCCGC<br>CAGGGTTTTCCCAGTCA   | Deletion-For |
|                          | FO4025 | AATTTGTAATAATATACACGTTTGTGACACACGCAGGAATA<br>TACCGTTGCTTTCTACTGGTAACGTAGTAATAGTCTATAGCG<br>GATAACAATTTTCACAC   | Deletion-Rev |
| <i>arp42<sup>+</sup></i> | FO4031 | ATACTAACTATTTACATAGACATGGGTAAGTGCGGTTAATC<br>AACCATAATATGTGTTGAGACGAAGACAATGGCATGAACGC<br>CAGGGTTTTCCCAGTCA    | Deletion-For |
|                          | FO4026 | TGCGAGATTTTCGTAAATTTATTTTATACTCTCTTGGGTTTTGA<br>AGACTTTATTTTTGTGAGCAAATAACACAGGCGGATAGCG<br>GATAACAATTTTCACAC  | Deletion-Rev |
|                          | FO5236 | TTCAACATTTGTGGGTATCTAAGCAAGAGTACGATGAAGTAG<br>GTGTTGACAGAGCTTTGTTTGTGAGAAAAGATGCAAGCGG<br>ATCCCCGGGTTAATTAA    | TAP-For      |
|                          | FO5237 | ATGCGAGATTTTCGTAAATTTATTTTATACTCTCTTGGGTTTTG<br>AAGACTTTATTTTTGTGAGCAAATAACACAGGCGGAGAATT<br>CGAGCTCGTTTAAAC   | TAP-Rev      |
| <i>arp9<sup>+</sup></i>  | FO4027 | AGATTAGTGAGTAGTATGACTTGTATCGTAAACCACAATTCA<br>TCCATAGCACAAACAAAGCAATCGGTTTGGGAAAACGACGC<br>CAGGGTTTTCCCAGTCA   | Deletion-For |

|                          |        |                                                                                                                   |              |
|--------------------------|--------|-------------------------------------------------------------------------------------------------------------------|--------------|
|                          | FO4028 | AAGTACCTTTTCGCACGAGTCAATTGATTTCTTAAAATACCGT<br>GACAGGCAATTAACCTTTTATGTGATGAACGAGAGTAAAGC<br>GGATAACAATTTACACAC    | Deletion-Rev |
|                          | FO5238 | TTAATGAATCTGTATCTTCCCATTATGTTACACTTGAGGAATA<br>TGCCCAACATGGACCCACAGCGATTCATACAAAGCAACGGA<br>TCCCCGGGTTAATTAA      | TAP-For      |
|                          | FO5239 | AAGTACCTTTTCGCACGAGTCAATTGATTTCTTAAAATACCGT<br>GACAGGCAATTAACCTTTTATGTGATGAACGAGAGTAAGAAT<br>TCGAGCTCGTTTAAAC     | TAP-Rev      |
| <i>ssr4<sup>+</sup></i>  | FO4029 | AACAAAGCCAAAACCTTCTGCATCTTGATAGATATGAGTAAGT<br>TGTACCATCCAAAACCTTACATATAATTAATAAATCAACAACGCC<br>AGGGTTTTCCCAGTCA  | Deletion-For |
|                          | FO4030 | TAAAGTAGGACGTACGTACTTTTTCAAATCTTCTTTCTGATTA<br>GCCTCAACATGTTTTTCTATACTACACTTTAAATCTTAGCGG<br>ATAACAATTTACACAC     | Deletion-Rev |
| <i>rsc4<sup>+</sup></i>  | FO4285 | CAGTCGCAAGCGGACCTAATTAAGTTGATATACTCTATTCA<br>TTGTACATAAACGTTGCAATATAATAAATTATTTAAAACGCCA<br>GGTTTTCCCAGTCACGAC    | Deletion-For |
|                          | FO4286 | TGTACATATTTCAAACGAATGATACCATTTATTTTAATTCCTT<br>GTATTAATACATTTTGTCTCTATCCAAAAGTGTAGCAGCGG<br>ATAACAATTTACACACAGGA  | Deletion-Rev |
| <i>rsc9<sup>+</sup></i>  | FO4911 | CCACTTAGTATTTTCGAAAAGTTGTGAAAGGTTTCGTTATACT<br>ACTTTTGACCACCTACTTACTTTACGACGCGCGCTTCACGC<br>CAGGGTTTTCCCAGTCA     | Deletion-For |
|                          | FO4912 | ATATGAAAAGTGATGTCGAGATGCTTGACCTTAGCAATGAG<br>ATTTAAAAGACATGTTATGACTATCGAGCCATCCAAAATAGC<br>GGATAACAATTTACACAC     | Deletion-Rev |
| <i>rsc58<sup>+</sup></i> | FO4913 | TCTGGGCATATTTTGAGTATTTGAAACGCATTACCGTTATCC<br>GGCCTTTTTTGATAGCAATTCGTAAAACAACTCGGCACGC<br>CAGGGTTTTCCCAGTCA       | Deletion-For |
|                          | FO4914 | TATATATATGTATGTATATACATCTATTAATTAGTTAACTAAA<br>ATCTTTAAGTAACACCATGGAAATAGAGAACGAATTAGCGGA<br>TAACAATTTACACAC      | Deletion-Rev |
| <i>sol1<sup>+</sup></i>  | FO4915 | CCAAGCGCCTTAGACGTTAATATATTGAAACGTGTATTTTAA<br>GGTCCCTTACTCTTTGTTTGATTTAGTATGAGGAATCCGCC<br>AGGGTTTTCCCAGTCA       | Deletion-For |
|                          | FO4916 | GACAATATACATACAGAAACGCATCAGATTAAGTAACTAGAAATGAA<br>GACAAAAATATTAACGTTTGGAAAATTATCTACAAATAGCG<br>GATAACAATTTACACAC | Deletion-Rev |
| <i>taf14<sup>+</sup></i> | FO4917 | GCCCGATATCTTCTCACGACTCGCTAAGCGTCTTCTATCC<br>ATATATTTTTCGTCCTCATATACATTGATTTAAGAATACGCCA<br>GGTTTTCCCAGTCA         | Deletion-For |
|                          | FO4918 | CAGTCTTCAGGAAAAAAGTAGAATGGGGAACTAACGCTTC<br>TCCCTTAAAGTAGGCTGCACAAAACGCAATGCTCTTAAAGC<br>GGATAACAATTTACACAC       | Deletion-Rev |
| <i>snf59<sup>+</sup></i> | FO4919 | AATTAGGTACAAGTCTATAAAATCACGCTTGGTTTTGGAATT<br>GATATTCGTAACATTTTCGTTTGACACCAACTTTTCTTCGCC<br>AGGGTTTTCCCAGTCA      | Deletion-For |
|                          | FO4920 | ACCAATAGCAACTAGCCTAAATCCAATTGATCGAAAATATGA<br>TAGCTCAGCAATGCAATTAATAATTTTAAATATAAAGTAGCG<br>GATAACAATTTACACAC     | Deletion-Rev |
|                          | FO3968 | TCATGAGGACAAGAAATCTAAGGAAAGAAGCAAGGTTAAGT<br>TATTATACAAAATTACGAGGTGTCAACAGATCTGTTTCACGG<br>ATCCCCGGGTTAATTAA      | TAP-For      |

|                            |        |                                                                                                                |              |
|----------------------------|--------|----------------------------------------------------------------------------------------------------------------|--------------|
|                            | FO3969 | ACCAATAGCAACTAGCCTAAATCCACTTGATCGAAAATATGA<br>TAGCTCAGCAATGCAATTAATAATTTTTAATATAAAAGTGAATT<br>CGAGCTCGTTTTAAAC | TAP-Rev      |
| <i>snf30<sup>+</sup></i>   | FO4921 | ACAAGAAGTTACAACAAATTTTTTAAAAAACTGGTTATTTAA<br>GTTATATCTCCTTTTTAAGTTAACTACGTTTGTAATACGCCAG<br>GGTTTTCCCAGTCA    | Deletion-For |
|                            | FO4922 | TTACGTTTAGATAAATGATCAATTA AACATAAAAATTACAGGA<br>CATAGCTTTTCTATATCATAAACTTCAAAAACACCACAGCGG<br>ATAACAATTTACAC   | Deletion-Rev |
|                            | FO3970 | GTTTTTTTGATTACAACAAGCTCAAGTTCAGGCTCGAGCAT<br>TGATGCAAAGATATCAACAGGGGATGGAATTTAACAAACGG<br>ATCCCCGGGTTAATTA     | TAP-For      |
|                            | FO3971 | TTACGTTTAGATAAATGATCAATTA AACATAAAAATTACAGGA<br>CATAGCTTTTCTATATCATAAACTTCAAAAACACCACGAATTC<br>GAGCTCGTTTTAAAC | TAP-Rev      |
| <i>fip1<sup>+</sup></i>    | FO6125 | GTCGGAGTTGGTGTCCACTT                                                                                           | ChIP         |
|                            | FO6126 | GCCAATGTCCTTTGTCTCGT                                                                                           | ChIP         |
| <i>str3<sup>+</sup></i>    | FO6127 | GCTAATCAGTAACCAGGGTTGT                                                                                         | ChIP         |
|                            | FO6128 | CACCGCGGTTAAGAAGCTC                                                                                            | ChIP         |
| <i>frp1<sup>+</sup> 3'</i> | FO5994 | CTTCCAGACTTCGGAGTGAA                                                                                           | ChIP         |
|                            | FO5995 | TTTCCAAAAGCAAACGGAGT                                                                                           | ChIP         |
| <i>frp1<sup>+</sup></i>    | FO5990 | TGTACAAAGCCTCCCCTCTG                                                                                           | ChIP         |
|                            | FO5991 | GCCGCTTCGCTATACACTA                                                                                            | ChIP         |
| <i>pex7<sup>+</sup></i>    | FO6270 | TCCCACCCTTATCGAAGCTA                                                                                           | ChIP         |
|                            | FO6271 | GCGAAGCTTGTTTCCTCAAC                                                                                           | ChIP         |
| <i>obr1<sup>+</sup></i>    | FO6272 | ACCCAAAGTCCCCACTTAG                                                                                            | ChIP         |
|                            | FO6273 | CAAACCGATTTTGTGCTTGA                                                                                           | ChIP         |
| <i>pho1<sup>+</sup></i>    | FO6282 | TGGTTCGGGACACATTTACA                                                                                           | ChIP         |
|                            | FO6283 | CACAAACGAAACCAACAACG                                                                                           | ChIP         |
| <i>spo3<sup>+</sup></i>    | FO4013 | GTGCGCTTCAATGAGTTAACACTC                                                                                       | ChIP         |
|                            | FO4014 | AGTGTGGGGAAACTTTTTATTAATC                                                                                      | ChIP         |
| <i>hcs1<sup>+</sup></i>    | FO6129 | GCGAATTGTTCACTTGTTCCA                                                                                          | ChIP         |
|                            | FO6130 | TCATACGTTACGTTTTCTCG                                                                                           | ChIP         |
|                            | FO5758 | CTCGTGTTGTACTCCCAAT                                                                                            | RT-PCR       |
|                            | FO5759 | CTTCCAAACGACCAATCTTGC                                                                                          | RT-PCR       |
| <i>ght3<sup>+</sup></i>    | FO5113 | GAAGAATTCATTGAAAATGCT                                                                                          | RT-PCR       |
|                            | FO5764 | TCTAGAAGTGCCTCGCTATCA                                                                                          | RT-PCR       |
| <i>ght4<sup>+</sup></i>    | FO5115 | ACGTTTTATCGAAAATGCAGA                                                                                          | RT-PCR       |
|                            | FO5765 | CCTCATGAAACTAGTCACTTCC                                                                                         | RT-PCR       |
| <i>ght5<sup>+</sup></i>    | FO5117 | TCTAGCAATGACATTAGTTCC                                                                                          | RT-PCR       |
|                            | FO5766 | AAATGCAGCGAGTGAGACAAG                                                                                          | RT-PCR       |

### Supplementary references.

1. Cairns, B.R., Erdjument-Bromage, H., Tempst, P., Winston, F. & Kornberg, R.D. Two actin-related proteins are shared functional components of the chromatin-remodeling complexes RSC and SWI/SNF. *Mol Cell* **2**, 639-51 (1998).
2. Pelletier, B., Beaudoin, J., Mukai, Y. & Labbe, S. Fep1, an iron sensor regulating iron transporter gene expression in *Schizosaccharomyces pombe*. *J Biol Chem* **277**, 22950-8 (2002).
3. Janoo, R.T., Neely, L.A., Braun, B.R., Whitehall, S.K. & Hoffman, C.S. Transcriptional regulators of the *Schizosaccharomyces pombe fbp1* gene include two redundant Tup1p-like corepressors and the CCAAT binding factor activation complex. *Genetics* **157**, 1205-15 (2001).
4. Jeanmougin, F., Thompson, J.D., Gouy, M., Higgins, D.G. & Gibson, T.J. Multiple sequence alignment with Clustal X. *Trends Biochem Sci* **23**, 403-5 (1998).
